# Supplementary material for: RNA sequencing demonstrates large-scale temporal dysregulation of gene expression in stimulated macrophages derived from MHC-defined chicken haplotypes
Source: PLoS One. 2017 Aug 28;12(8):e0179391. doi: 10.1371/journal.pone.0179391 (PMC5573159; doi:10.1371/journal.pone.0179391)
Supplement: S4 Table — Since the B2 chickens exhibited the most robust macrophage phenotype these samples were used for the analysis as a means of characterizing the Reactome pathways that were associated with the altered gene expression across the experimental time points. Note ‘AB’ indicates B2 haplotype. The file contains a total of 110 rows including the header line containing field names (Sample Comparison—indicates the specific pair of time points for which gene expression changes were identified; Gene Set—indicates the specific set of differentially expressed genes, ‘Down’ or ‘Up’; Category—indicates the specific subset of terms that were used for the analysis; Term—provides the Reactome pathway identifier for the identified pathway term/annotation; Description—the specific enriched Reactome pathway term; Gene Count—the number of genes within the differentially expressed genes that are mapped to the particular enriched Reactome pathway term; %—the corresponding percent associated with the specific number of genes; P-Value—the p-value associated with the Reactome pathway term enrichment). (XLSX) [file pone.0179391.s004.xlsx]

## Sheet: Sheet1
Sample Comparison	Gene Set	Category	Term	Description	Gene Count	%	PValue
AB-6 vs AB-3	Down	REACTOME_PATHWAY	R-GGA-5419276:R-GGA-5419276	Mitochondrial translation termination	41	0.830969	4.05527e-10
AB-6 vs AB-3	Down	REACTOME_PATHWAY	R-GGA-5389840:R-GGA-5389840	Mitochondrial translation elongation	39	0.790434	5.56949e-09
AB-6 vs AB-3	Down	REACTOME_PATHWAY	R-GGA-73772:R-GGA-73772	RNA Polymerase I Promoter Escape	22	0.445886	3.93646e-08
AB-6 vs AB-3	Down	REACTOME_PATHWAY	R-GGA-73863:R-GGA-73863	RNA Polymerase I Transcription Termination	22	0.445886	3.93646e-08
AB-6 vs AB-3	Down	REACTOME_PATHWAY	R-GGA-73762:R-GGA-73762	RNA Polymerase I Transcription Initiation	26	0.526956	3.3859e-07
AB-6 vs AB-3	Down	REACTOME_PATHWAY	R-GGA-73779:R-GGA-73779	RNA Polymerase II Transcription Pre-Initiation And Promoter Opening	24	0.486421	5.03683e-06
AB-6 vs AB-3	Down	REACTOME_PATHWAY	R-GGA-75953:R-GGA-75953	RNA Polymerase II Transcription Initiation	24	0.486421	5.03683e-06
AB-6 vs AB-3	Down	REACTOME_PATHWAY	R-GGA-76042:R-GGA-76042	RNA Polymerase II Transcription Initiation And Promoter Clearance	24	0.486421	5.03683e-06
AB-6 vs AB-3	Down	REACTOME_PATHWAY	R-GGA-674695:R-GGA-674695	RNA Polymerase II Pre-transcription Events	34	0.689096	5.57842e-06
AB-6 vs AB-3	Down	REACTOME_PATHWAY	R-GGA-72086:R-GGA-72086	mRNA Capping	19	0.385083	1.1518e-05
AB-6 vs AB-3	Down	REACTOME_PATHWAY	R-GGA-6781823:R-GGA-6781823	Formation of TC-NER Pre-Incision Complex	29	0.587758	1.94701e-05
AB-6 vs AB-3	Down	REACTOME_PATHWAY	R-GGA-6782135:R-GGA-6782135	Dual incision in TC-NER	31	0.628293	2.03915e-05
AB-6 vs AB-3	Down	REACTOME_PATHWAY	R-GGA-77075:R-GGA-77075	RNA Pol II CTD phosphorylation and interaction with CE	17	0.344548	6.17191e-05
AB-6 vs AB-3	Down	REACTOME_PATHWAY	R-GGA-6782210:R-GGA-6782210	Gap-filling DNA repair synthesis and ligation in TC-NER	29	0.587758	7.35178e-05
AB-6 vs AB-3	Down	REACTOME_PATHWAY	R-GGA-113418:R-GGA-113418	Formation of the Early Elongation Complex	19	0.385083	9.42938e-05
AB-6 vs AB-3	Down	REACTOME_PATHWAY	R-GGA-75955:R-GGA-75955	RNA Polymerase II Transcription Elongation	24	0.486421	0.000137817
AB-6 vs AB-3	Down	REACTOME_PATHWAY	R-GGA-72165:R-GGA-72165	mRNA Splicing - Minor Pathway	26	0.526956	0.000259869
AB-6 vs AB-3	Down	REACTOME_PATHWAY	R-GGA-72163:R-GGA-72163	mRNA Splicing - Major Pathway	51	1.03364	0.000617293
AB-6 vs AB-3	Down	REACTOME_PATHWAY	R-GGA-76061:R-GGA-76061	RNA Polymerase III Transcription Initiation From Type 1 Promoter	16	0.324281	0.000885847
AB-6 vs AB-3	Down	REACTOME_PATHWAY	R-GGA-983168:R-GGA-983168	Antigen processing: Ubiquitination & Proteasome degradation	32	0.648561	0.00126263
AB-6 vs AB-3	Down	REACTOME_PATHWAY	R-GGA-1834949:R-GGA-1834949	Cytosolic sensors of pathogen-associated DNA	12	0.24321	0.00129024
AB-6 vs AB-3	Down	REACTOME_PATHWAY	R-GGA-76066:R-GGA-76066	RNA Polymerase III Transcription Initiation From Type 2 Promoter	15	0.304013	0.00181174
AB-6 vs AB-3	Down	REACTOME_PATHWAY	R-GGA-76071:R-GGA-76071	RNA Polymerase III Transcription Initiation From Type 3 Promoter	15	0.304013	0.00181174
AB-6 vs AB-3	Down	REACTOME_PATHWAY	R-GGA-611105:R-GGA-611105	Respiratory electron transport	24	0.486421	0.00237962
AB-6 vs AB-3	Down	REACTOME_PATHWAY	R-GGA-6799198:R-GGA-6799198	Complex I biogenesis	24	0.486421	0.00237962
AB-6 vs AB-3	Down	REACTOME_PATHWAY	R-GGA-70895:R-GGA-70895	Branched-chain amino acid catabolism	12	0.24321	0.00328149
AB-6 vs AB-3	Down	REACTOME_PATHWAY	R-GGA-75109:R-GGA-75109	Triglyceride biosynthesis	12	0.24321	0.00713483
AB-6 vs AB-3	Down	REACTOME_PATHWAY	R-GGA-5696395:R-GGA-5696395	Formation of Incision Complex in GG-NER	19	0.385083	0.00871806
AB-6 vs AB-3	Down	REACTOME_PATHWAY	R-GGA-1855183:R-GGA-1855183	Synthesis of IP2, IP, and Ins in the cytosol	7	0.141873	0.00989613
AB-6 vs AB-3	Down	REACTOME_PATHWAY	R-GGA-112382:R-GGA-112382	Formation of RNA Pol II elongation complex	13	0.263478	0.0131901
AB-6 vs AB-3	Down	REACTOME_PATHWAY	R-GGA-73777:R-GGA-73777	RNA Polymerase I Chain Elongation	22	0.445886	0.0147279
AB-6 vs AB-3	Down	REACTOME_PATHWAY	R-GGA-5632684:R-GGA-5632684	Hedgehog 'on' state	26	0.526956	0.0188435
AB-6 vs AB-3	Down	REACTOME_PATHWAY	R-GGA-446193:R-GGA-446193	Biosynthesis of the N-glycan precursor (dolichol lipid-linked oligosaccharide, LLO) and transfer to a nascent protein	6	0.121605	0.0241437
AB-6 vs AB-3	Down	REACTOME_PATHWAY	R-GGA-380320:R-GGA-380320	Recruitment of NuMA to mitotic centrosomes	6	0.121605	0.0241437
AB-6 vs AB-3	Down	REACTOME_PATHWAY	R-GGA-5696400:R-GGA-5696400	Dual Incision in GG-NER	16	0.324281	0.026673
AB-6 vs AB-3	Down	REACTOME_PATHWAY	R-GGA-189451:R-GGA-189451	Heme biosynthesis	7	0.141873	0.0276341
AB-6 vs AB-3	Down	REACTOME_PATHWAY	R-GGA-180292:R-GGA-180292	GAB1 signalosome	8	0.16214	0.0286541
AB-6 vs AB-3	Down	REACTOME_PATHWAY	R-GGA-187577:R-GGA-187577	SCF(Skp2)-mediated degradation of p27/p21	19	0.385083	0.0394632
AB-6 vs AB-3	Down	REACTOME_PATHWAY	R-GGA-174084:R-GGA-174084	Autodegradation of Cdh1 by Cdh1:APC/C	21	0.425618	0.0429056
AB-6 vs AB-3	Down	REACTOME_PATHWAY	R-GGA-5693616:R-GGA-5693616	Presynaptic phase of homologous DNA pairing and strand exchange	18	0.364816	0.0439736
AB-3 vs. AB0	Down	REACTOME_PATHWAY	R-GGA-5663220:R-GGA-5663220	RHO GTPases Activate Formins	14	4.7138	1.84602e-07
AB-3 vs. AB0	Down	REACTOME_PATHWAY	R-GGA-2500257:R-GGA-2500257	Resolution of Sister Chromatid Cohesion	14	4.7138	2.19348e-07
AB-3 vs. AB0	Down	REACTOME_PATHWAY	R-GGA-2467813:R-GGA-2467813	Separation of Sister Chromatids	14	4.7138	1.40554e-06
AB-3 vs. AB0	Down	REACTOME_PATHWAY	R-GGA-69205:R-GGA-69205	G1/S-Specific Transcription	5	1.6835	0.00025328
AB-3 vs. AB0	Down	REACTOME_PATHWAY	R-GGA-113510:R-GGA-113510	E2F mediated regulation of DNA replication	5	1.6835	0.00025328
AB-3 vs. AB0	Down	REACTOME_PATHWAY	R-GGA-983189:R-GGA-983189	Kinesins	4	1.3468	0.00148778
AB-3 vs. AB0	Down	REACTOME_PATHWAY	R-GGA-156582:R-GGA-156582	Acetylation	3	1.0101	0.00284699
AB-3 vs. AB0	Down	REACTOME_PATHWAY	R-GGA-5358565:R-GGA-5358565	Mismatch repair (MMR) directed by MSH2:MSH6 (MutSalpha)	4	1.3468	0.00304478
AB-3 vs. AB0	Down	REACTOME_PATHWAY	R-GGA-5651801:R-GGA-5651801	PCNA-Dependent Long Patch Base Excision Repair	4	1.3468	0.00409159
AB-3 vs. AB0	Down	REACTOME_PATHWAY	R-GGA-512988:R-GGA-512988	Interleukin-3, 5 and GM-CSF signaling	4	1.3468	0.00677463
AB-3 vs. AB0	Down	REACTOME_PATHWAY	R-GGA-174411:R-GGA-174411	Polymerase switching on the C-strand of the telomere	3	1.0101	0.0239737
AB-3 vs. AB0	Down	REACTOME_PATHWAY	R-GGA-69091:R-GGA-69091	Polymerase switching	3	1.0101	0.0239737
AB-3 vs. AB0	Down	REACTOME_PATHWAY	R-GGA-912526:R-GGA-912526	Interleukin receptor SHC signaling	3	1.0101	0.0302002
AB-3 vs. AB0	Down	REACTOME_PATHWAY	R-GGA-69166:R-GGA-69166	Removal of the Flap Intermediate	3	1.0101	0.0302002
AB-3 vs. AB0	Down	REACTOME_PATHWAY	R-GGA-68962:R-GGA-68962	Activation of the pre-replicative complex	4	1.3468	0.0373618
AB-3 vs. AB0	Up	REACTOME_PATHWAY	R-GGA-977347:R-GGA-977347	Serine biosynthesis	2	1.81818	0.023431
AB-3 vs. AB0	Up	REACTOME_PATHWAY	R-GGA-433692:R-GGA-433692	Proton-coupled monocarboxylate transport	2	1.81818	0.0463292
AB0 vs. AB1	Down	REACTOME_PATHWAY	R-GGA-1799339:R-GGA-1799339	SRP-dependent cotranslational protein targeting to membrane	15	5.22648	4.23379e-11
AB0 vs. AB1	Down	REACTOME_PATHWAY	R-GGA-72706:R-GGA-72706	GTP hydrolysis and joining of the 60S ribosomal subunit	14	4.87805	2.46117e-10
AB0 vs. AB1	Down	REACTOME_PATHWAY	R-GGA-975956:R-GGA-975956	Nonsense Mediated Decay (NMD) independent of the Exon Junction Complex (EJC)	14	4.87805	6.01801e-10
AB0 vs. AB1	Down	REACTOME_PATHWAY	R-GGA-975957:R-GGA-975957	Nonsense Mediated Decay (NMD) enhanced by the Exon Junction Complex (EJC)	14	4.87805	5.098e-09
AB0 vs. AB1	Down	REACTOME_PATHWAY	R-GGA-72695:R-GGA-72695	Formation of the ternary complex, and subsequently, the 43S complex	9	3.13589	7.34658e-07
AB0 vs. AB1	Down	REACTOME_PATHWAY	R-GGA-72702:R-GGA-72702	Ribosomal scanning and start codon recognition	9	3.13589	1.4435e-06
AB0 vs. AB1	Down	REACTOME_PATHWAY	R-GGA-156590:R-GGA-156590	Glutathione conjugation	3	1.0453	0.0203071
AB0 vs. AB1	Down	REACTOME_PATHWAY	R-GGA-5673000:R-GGA-5673000	RAF activation	3	1.0453	0.0203071
AB0 vs. AB1	Down	REACTOME_PATHWAY	R-GGA-70614:R-GGA-70614	Amino acid synthesis and interconversion (transamination)	3	1.0453	0.0336834
AB1 vs. AB2	Up	REACTOME_PATHWAY	R-GGA-5419276:R-GGA-5419276	Mitochondrial translation termination	40	0.789889	3.55585e-07
AB1 vs. AB2	Up	REACTOME_PATHWAY	R-GGA-5389840:R-GGA-5389840	Mitochondrial translation elongation	39	0.770142	6.65817e-07
AB1 vs. AB2	Up	REACTOME_PATHWAY	R-GGA-674695:R-GGA-674695	RNA Polymerase II Pre-transcription Events	38	0.750395	1.23907e-06
AB1 vs. AB2	Up	REACTOME_PATHWAY	R-GGA-72163:R-GGA-72163	mRNA Splicing - Major Pathway	64	1.26382	1.25293e-06
AB1 vs. AB2	Up	REACTOME_PATHWAY	R-GGA-73762:R-GGA-73762	RNA Polymerase I Transcription Initiation	27	0.533175	1.4577e-06
AB1 vs. AB2	Up	REACTOME_PATHWAY	R-GGA-5696395:R-GGA-5696395	Formation of Incision Complex in GG-NER	27	0.533175	1.4577e-06
AB1 vs. AB2	Up	REACTOME_PATHWAY	R-GGA-2467813:R-GGA-2467813	Separation of Sister Chromatids	57	1.12559	2.32947e-06
AB1 vs. AB2	Up	REACTOME_PATHWAY	R-GGA-2500257:R-GGA-2500257	Resolution of Sister Chromatid Cohesion	50	0.987362	4.11219e-06
AB1 vs. AB2	Up	REACTOME_PATHWAY	R-GGA-1799339:R-GGA-1799339	SRP-dependent cotranslational protein targeting to membrane	43	0.849131	2.41078e-05
AB1 vs. AB2	Up	REACTOME_PATHWAY	R-GGA-3108214:R-GGA-3108214	SUMOylation of DNA damage response and repair proteins	34	0.671406	2.96949e-05
AB1 vs. AB2	Up	REACTOME_PATHWAY	R-GGA-75955:R-GGA-75955	RNA Polymerase II Transcription Elongation	27	0.533175	3.4587e-05
AB1 vs. AB2	Up	REACTOME_PATHWAY	R-GGA-6781823:R-GGA-6781823	Formation of TC-NER Pre-Incision Complex	31	0.612164	3.71659e-05
AB1 vs. AB2	Up	REACTOME_PATHWAY	R-GGA-6782135:R-GGA-6782135	Dual incision in TC-NER	33	0.651659	5.22387e-05
AB1 vs. AB2	Up	REACTOME_PATHWAY	R-GGA-73863:R-GGA-73863	RNA Polymerase I Transcription Termination	20	0.394945	6.4208e-05
AB1 vs. AB2	Up	REACTOME_PATHWAY	R-GGA-73772:R-GGA-73772	RNA Polymerase I Promoter Escape	20	0.394945	6.4208e-05
AB1 vs. AB2	Up	REACTOME_PATHWAY	R-GGA-76042:R-GGA-76042	RNA Polymerase II Transcription Initiation And Promoter Clearance	24	0.473934	9.35541e-05
AB1 vs. AB2	Up	REACTOME_PATHWAY	R-GGA-75953:R-GGA-75953	RNA Polymerase II Transcription Initiation	24	0.473934	9.35541e-05
AB1 vs. AB2	Up	REACTOME_PATHWAY	R-GGA-73779:R-GGA-73779	RNA Polymerase II Transcription Pre-Initiation And Promoter Opening	24	0.473934	9.35541e-05
AB1 vs. AB2	Up	REACTOME_PATHWAY	R-GGA-975957:R-GGA-975957	Nonsense Mediated Decay (NMD) enhanced by the Exon Junction Complex (EJC)	47	0.92812	0.000153527
AB1 vs. AB2	Up	REACTOME_PATHWAY	R-GGA-6782210:R-GGA-6782210	Gap-filling DNA repair synthesis and ligation in TC-NER	31	0.612164	0.000157563
AB1 vs. AB2	Up	REACTOME_PATHWAY	R-GGA-72706:R-GGA-72706	GTP hydrolysis and joining of the 60S ribosomal subunit	39	0.770142	0.000176502
AB1 vs. AB2	Up	REACTOME_PATHWAY	R-GGA-975956:R-GGA-975956	Nonsense Mediated Decay (NMD) independent of the Exon Junction Complex (EJC)	41	0.809637	0.000197298
AB1 vs. AB2	Up	REACTOME_PATHWAY	R-GGA-72165:R-GGA-72165	mRNA Splicing - Minor Pathway	28	0.552923	0.000411467
AB1 vs. AB2	Up	REACTOME_PATHWAY	R-GGA-72086:R-GGA-72086	mRNA Capping	18	0.35545	0.000697371
AB1 vs. AB2	Up	REACTOME_PATHWAY	R-GGA-5663220:R-GGA-5663220	RHO GTPases Activate Formins	44	0.868878	0.000857196
AB1 vs. AB2	Up	REACTOME_PATHWAY	R-GGA-1834949:R-GGA-1834949	Cytosolic sensors of pathogen-associated DNA	13	0.256714	0.00089528
AB1 vs. AB2	Up	REACTOME_PATHWAY	R-GGA-72695:R-GGA-72695	Formation of the ternary complex, and subsequently, the 43S complex	25	0.493681	0.00107202
AB1 vs. AB2	Up	REACTOME_PATHWAY	R-GGA-76061:R-GGA-76061	RNA Polymerase III Transcription Initiation From Type 1 Promoter	17	0.335703	0.00131994
AB1 vs. AB2	Up	REACTOME_PATHWAY	R-GGA-204005:R-GGA-204005	COPII (Coat Protein 2) Mediated Vesicle Transport	31	0.612164	0.00159528
AB1 vs. AB2	Up	REACTOME_PATHWAY	R-GGA-72702:R-GGA-72702	Ribosomal scanning and start codon recognition	26	0.513428	0.00209769
AB1 vs. AB2	Up	REACTOME_PATHWAY	R-GGA-76071:R-GGA-76071	RNA Polymerase III Transcription Initiation From Type 3 Promoter	16	0.315956	0.00246647
AB1 vs. AB2	Up	REACTOME_PATHWAY	R-GGA-77075:R-GGA-77075	RNA Pol II CTD phosphorylation and interaction with CE	16	0.315956	0.00246647
AB1 vs. AB2	Up	REACTOME_PATHWAY	R-GGA-76066:R-GGA-76066	RNA Polymerase III Transcription Initiation From Type 2 Promoter	16	0.315956	0.00246647
AB1 vs. AB2	Up	REACTOME_PATHWAY	R-GGA-2424491:R-GGA-2424491	DAP12 signaling	16	0.315956	0.00246647
AB1 vs. AB2	Up	REACTOME_PATHWAY	R-GGA-983712:R-GGA-983712	Ion channel transport	13	0.256714	0.00277993
AB1 vs. AB2	Up	REACTOME_PATHWAY	R-GGA-113418:R-GGA-113418	Formation of the Early Elongation Complex	18	0.35545	0.00346095
AB1 vs. AB2	Up	REACTOME_PATHWAY	R-GGA-917977:R-GGA-917977	Transferrin endocytosis and recycling	14	0.276461	0.00368544
AB1 vs. AB2	Up	REACTOME_PATHWAY	R-GGA-71403:R-GGA-71403	Citric acid cycle (TCA cycle)	12	0.236967	0.00544786
AB1 vs. AB2	Up	REACTOME_PATHWAY	R-GGA-5696400:R-GGA-5696400	Dual Incision in GG-NER	19	0.375197	0.00720111
AB1 vs. AB2	Up	REACTOME_PATHWAY	R-GGA-166208:R-GGA-166208	mTORC1-mediated signalling	10	0.197472	0.00787404
AB1 vs. AB2	Up	REACTOME_PATHWAY	R-GGA-4615885:R-GGA-4615885	SUMOylation of DNA replication proteins	21	0.414692	0.00804611
AB1 vs. AB2	Up	REACTOME_PATHWAY	R-GGA-917729:R-GGA-917729	Endosomal Sorting Complex Required For Transport (ESCRT)	14	0.276461	0.00824247
AB1 vs. AB2	Up	REACTOME_PATHWAY	R-GGA-611105:R-GGA-611105	Respiratory electron transport	25	0.493681	0.00897124
AB1 vs. AB2	Up	REACTOME_PATHWAY	R-GGA-3301854:R-GGA-3301854	Nuclear Pore Complex (NPC) Disassembly	16	0.315956	0.0103743
AB1 vs. AB2	Up	REACTOME_PATHWAY	R-GGA-5674135:R-GGA-5674135	MAP2K and MAPK activation	11	0.21722	0.0105086
AB1 vs. AB2	Up	REACTOME_PATHWAY	R-GGA-6807878:R-GGA-6807878	COPI-mediated anterograde transport	28	0.552923	0.0135694
AB1 vs. AB2	Up	REACTOME_PATHWAY	R-GGA-77387:R-GGA-77387	Insulin receptor recycling	13	0.256714	0.0146919
AB1 vs. AB2	Up	REACTOME_PATHWAY	R-GGA-212436:R-GGA-212436	Generic Transcription Pathway	13	0.256714	0.0146919
AB1 vs. AB2	Up	REACTOME_PATHWAY	R-GGA-156590:R-GGA-156590	Glutathione conjugation	9	0.177725	0.0157911
AB1 vs. AB2	Up	REACTOME_PATHWAY	R-GGA-112382:R-GGA-112382	Formation of RNA Pol II elongation complex	14	0.276461	0.0162552
AB1 vs. AB2	Up	REACTOME_PATHWAY	R-GGA-6799198:R-GGA-6799198	Complex I biogenesis	24	0.473934	0.0204793
AB1 vs. AB2	Up	REACTOME_PATHWAY	R-GGA-187577:R-GGA-187577	SCF(Skp2)-mediated degradation of p27/p21	22	0.434439	0.0206488
AB1 vs. AB2	Up	REACTOME_PATHWAY	R-GGA-168638:R-GGA-168638	NOD1/2 Signaling Pathway	11	0.21722	0.0231605
AB1 vs. AB2	Up	REACTOME_PATHWAY	R-GGA-912631:R-GGA-912631	Regulation of signaling by CBL	11	0.21722	0.0231605
AB1 vs. AB2	Up	REACTOME_PATHWAY	R-GGA-75109:R-GGA-75109	Triglyceride biosynthesis	12	0.236967	0.0256811
AB1 vs. AB2	Up	REACTOME_PATHWAY	R-GGA-5675221:R-GGA-5675221	Negative regulation of MAPK pathway	12	0.236967	0.0256811
AB1 vs. AB2	Up	REACTOME_PATHWAY	R-GGA-202424:R-GGA-202424	Downstream TCR signaling	13	0.256714	0.0275908
AB1 vs. AB2	Up	REACTOME_PATHWAY	R-GGA-2871796:R-GGA-2871796	FCERI mediated MAPK activation	14	0.276461	0.0290002
AB1 vs. AB2	Up	REACTOME_PATHWAY	R-GGA-174084:R-GGA-174084	Autodegradation of Cdh1 by Cdh1:APC/C	24	0.473934	0.0296098
AB1 vs. AB2	Up	REACTOME_PATHWAY	R-GGA-2730905:R-GGA-2730905	Role of LAT2/NTAL/LAB on calcium mobilization	8	0.157978	0.0310701
AB1 vs. AB2	Up	REACTOME_PATHWAY	R-GGA-5607764:R-GGA-5607764	CLEC7A (Dectin-1) signaling	10	0.197472	0.0410425
AB1 vs. AB2	Up	REACTOME_PATHWAY	R-GGA-70895:R-GGA-70895	Branched-chain amino acid catabolism	11	0.21722	0.043912
AB1 vs. AB2	Up	REACTOME_PATHWAY	R-GGA-1660499:R-GGA-1660499	Synthesis of PIPs at the plasma membrane	19	0.375197	0.0462059
AB1 vs. AB2	Up	REACTOME_PATHWAY	R-GGA-381038:R-GGA-381038	XBP1(S) activates chaperone genes	6	0.118483	0.0483076
AB1 vs. AB2	Up	REACTOME_PATHWAY	R-GGA-446193:R-GGA-446193	Biosynthesis of the N-glycan precursor (dolichol lipid-linked oligosaccharide, LLO) and transfer to a nascent protein	6	0.118483	0.0483076
AB2 vs. AB4	Down	REACTOME_PATHWAY	R-GGA-2467813:R-GGA-2467813	Separation of Sister Chromatids	11	3.7037	2.41456e-05
AB2 vs. AB4	Down	REACTOME_PATHWAY	R-GGA-5663220:R-GGA-5663220	RHO GTPases Activate Formins	10	3.367	3.79975e-05
AB2 vs. AB4	Down	REACTOME_PATHWAY	R-GGA-2500257:R-GGA-2500257	Resolution of Sister Chromatid Cohesion	10	3.367	4.25762e-05
AB2 vs. AB4	Down	REACTOME_PATHWAY	R-GGA-5620912:R-GGA-5620912	Anchoring of the basal body to the plasma membrane	6	2.0202	0.0164436
AB2 vs. AB4	Down	REACTOME_PATHWAY	R-GGA-5693568:R-GGA-5693568	Resolution of D-loop Structures through Holliday Junction Intermediates	4	1.3468	0.0164881
AB2 vs. AB4	Down	REACTOME_PATHWAY	R-GGA-5620922:R-GGA-5620922	BBSome-mediated cargo-targeting to cilium	3	1.0101	0.0223699
AB2 vs. AB4	Down	REACTOME_PATHWAY	R-GGA-69205:R-GGA-69205	G1/S-Specific Transcription	3	1.0101	0.026921
AB2 vs. AB4	Down	REACTOME_PATHWAY	R-GGA-113510:R-GGA-113510	E2F mediated regulation of DNA replication	3	1.0101	0.026921
AB2 vs. AB4	Down	REACTOME_PATHWAY	R-GGA-176187:R-GGA-176187	Activation of ATR in response to replication stress	4	1.3468	0.0279993
AB2 vs. AB4	Down	REACTOME_PATHWAY	R-GGA-606279:R-GGA-606279	Deposition of new CENPA-containing nucleosomes at the centromere	4	1.3468	0.0365045
AB2 vs. AB4	Down	REACTOME_PATHWAY	R-GGA-2565942:R-GGA-2565942	Regulation of PLK1 Activity at G2/M Transition	5	1.6835	0.0387948
AB2 vs. AB4	Down	REACTOME_PATHWAY	R-GGA-5693616:R-GGA-5693616	Presynaptic phase of homologous DNA pairing and strand exchange	4	1.3468	0.0428295
AB2 vs. AB4	Down	REACTOME_PATHWAY	R-GGA-141444:R-GGA-141444	Amplification of signal from unattached kinetochores via a MAD2 inhibitory signal	2	0.673401	0.0471353
AB2 vs. AB4	Down	REACTOME_PATHWAY	R-GGA-156711:R-GGA-156711	Polo-like kinase mediated events	2	0.673401	0.0471353
AB4 vs. AB8	Down	REACTOME_PATHWAY	R-GGA-73762:R-GGA-73762	RNA Polymerase I Transcription Initiation	29	0.54236	4.07117e-08
AB4 vs. AB8	Down	REACTOME_PATHWAY	R-GGA-72163:R-GGA-72163	mRNA Splicing - Major Pathway	68	1.27174	6.37355e-08
AB4 vs. AB8	Down	REACTOME_PATHWAY	R-GGA-5419276:R-GGA-5419276	Mitochondrial translation termination	41	0.766785	2.04589e-07
AB4 vs. AB8	Down	REACTOME_PATHWAY	R-GGA-73772:R-GGA-73772	RNA Polymerase I Promoter Escape	22	0.411446	1.56268e-06
AB4 vs. AB8	Down	REACTOME_PATHWAY	R-GGA-5389840:R-GGA-5389840	Mitochondrial translation elongation	39	0.729381	1.72609e-06
AB4 vs. AB8	Down	REACTOME_PATHWAY	R-GGA-674695:R-GGA-674695	RNA Polymerase II Pre-transcription Events	38	0.710679	3.11144e-06
AB4 vs. AB8	Down	REACTOME_PATHWAY	R-GGA-1799339:R-GGA-1799339	SRP-dependent cotranslational protein targeting to membrane	45	0.841593	6.11226e-06
AB4 vs. AB8	Down	REACTOME_PATHWAY	R-GGA-73863:R-GGA-73863	RNA Polymerase I Transcription Termination	21	0.392744	1.53408e-05
AB4 vs. AB8	Down	REACTOME_PATHWAY	R-GGA-6781823:R-GGA-6781823	Formation of TC-NER Pre-Incision Complex	32	0.598466	1.93049e-05
AB4 vs. AB8	Down	REACTOME_PATHWAY	R-GGA-975957:R-GGA-975957	Nonsense Mediated Decay (NMD) enhanced by the Exon Junction Complex (EJC)	50	0.935104	2.13253e-05
AB4 vs. AB8	Down	REACTOME_PATHWAY	R-GGA-73779:R-GGA-73779	RNA Polymerase II Transcription Pre-Initiation And Promoter Opening	25	0.467552	3.47426e-05
AB4 vs. AB8	Down	REACTOME_PATHWAY	R-GGA-75953:R-GGA-75953	RNA Polymerase II Transcription Initiation	25	0.467552	3.47426e-05
AB4 vs. AB8	Down	REACTOME_PATHWAY	R-GGA-76042:R-GGA-76042	RNA Polymerase II Transcription Initiation And Promoter Clearance	25	0.467552	3.47426e-05
AB4 vs. AB8	Down	REACTOME_PATHWAY	R-GGA-72706:R-GGA-72706	GTP hydrolysis and joining of the 60S ribosomal subunit	41	0.766785	4.75277e-05
AB4 vs. AB8	Down	REACTOME_PATHWAY	R-GGA-975956:R-GGA-975956	Nonsense Mediated Decay (NMD) independent of the Exon Junction Complex (EJC)	43	0.804189	5.97048e-05
AB4 vs. AB8	Down	REACTOME_PATHWAY	R-GGA-75955:R-GGA-75955	RNA Polymerase II Transcription Elongation	27	0.504956	6.67567e-05
AB4 vs. AB8	Down	REACTOME_PATHWAY	R-GGA-5696395:R-GGA-5696395	Formation of Incision Complex in GG-NER	25	0.467552	9.14319e-05
AB4 vs. AB8	Down	REACTOME_PATHWAY	R-GGA-6782210:R-GGA-6782210	Gap-filling DNA repair synthesis and ligation in TC-NER	32	0.598466	9.24338e-05
AB4 vs. AB8	Down	REACTOME_PATHWAY	R-GGA-6782135:R-GGA-6782135	Dual incision in TC-NER	33	0.617169	0.000109583
AB4 vs. AB8	Down	REACTOME_PATHWAY	R-GGA-72086:R-GGA-72086	mRNA Capping	19	0.355339	0.000211048
AB4 vs. AB8	Down	REACTOME_PATHWAY	R-GGA-72165:R-GGA-72165	mRNA Splicing - Minor Pathway	28	0.523658	0.000753621
AB4 vs. AB8	Down	REACTOME_PATHWAY	R-GGA-77075:R-GGA-77075	RNA Pol II CTD phosphorylation and interaction with CE	17	0.317935	0.000782919
AB4 vs. AB8	Down	REACTOME_PATHWAY	R-GGA-113418:R-GGA-113418	Formation of the Early Elongation Complex	19	0.355339	0.0013967
AB4 vs. AB8	Down	REACTOME_PATHWAY	R-GGA-187577:R-GGA-187577	SCF(Skp2)-mediated degradation of p27/p21	25	0.467552	0.00182593
AB4 vs. AB8	Down	REACTOME_PATHWAY	R-GGA-5674135:R-GGA-5674135	MAP2K and MAPK activation	12	0.224425	0.00254965
AB4 vs. AB8	Down	REACTOME_PATHWAY	R-GGA-1632852:R-GGA-1632852	Macroautophagy	29	0.54236	0.00257877
AB4 vs. AB8	Down	REACTOME_PATHWAY	R-GGA-72702:R-GGA-72702	Ribosomal scanning and start codon recognition	26	0.486254	0.00353756
AB4 vs. AB8	Down	REACTOME_PATHWAY	R-GGA-6807878:R-GGA-6807878	COPI-mediated anterograde transport	30	0.561062	0.00441541
AB4 vs. AB8	Down	REACTOME_PATHWAY	R-GGA-3108214:R-GGA-3108214	SUMOylation of DNA damage response and repair proteins	30	0.561062	0.00441541
AB4 vs. AB8	Down	REACTOME_PATHWAY	R-GGA-72695:R-GGA-72695	Formation of the ternary complex, and subsequently, the 43S complex	24	0.44885	0.00521353
AB4 vs. AB8	Down	REACTOME_PATHWAY	R-GGA-6799198:R-GGA-6799198	Complex I biogenesis	26	0.486254	0.00588763
AB4 vs. AB8	Down	REACTOME_PATHWAY	R-GGA-204005:R-GGA-204005	COPII (Coat Protein 2) Mediated Vesicle Transport	30	0.561062	0.0068702
AB4 vs. AB8	Down	REACTOME_PATHWAY	R-GGA-1834949:R-GGA-1834949	Cytosolic sensors of pathogen-associated DNA	12	0.224425	0.00728204
AB4 vs. AB8	Down	REACTOME_PATHWAY	R-GGA-983168:R-GGA-983168	Antigen processing: Ubiquitination & Proteasome degradation	34	0.635871	0.0074383
AB4 vs. AB8	Down	REACTOME_PATHWAY	R-GGA-76061:R-GGA-76061	RNA Polymerase III Transcription Initiation From Type 1 Promoter	16	0.299233	0.00760776
AB4 vs. AB8	Down	REACTOME_PATHWAY	R-GGA-174084:R-GGA-174084	Autodegradation of Cdh1 by Cdh1:APC/C	26	0.486254	0.00939133
AB4 vs. AB8	Down	REACTOME_PATHWAY	R-GGA-202424:R-GGA-202424	Downstream TCR signaling	14	0.261829	0.0112755
AB4 vs. AB8	Down	REACTOME_PATHWAY	R-GGA-917729:R-GGA-917729	Endosomal Sorting Complex Required For Transport (ESCRT)	14	0.261829	0.0112755
AB4 vs. AB8	Down	REACTOME_PATHWAY	R-GGA-76066:R-GGA-76066	RNA Polymerase III Transcription Initiation From Type 2 Promoter	15	0.280531	0.0129951
AB4 vs. AB8	Down	REACTOME_PATHWAY	R-GGA-76071:R-GGA-76071	RNA Polymerase III Transcription Initiation From Type 3 Promoter	15	0.280531	0.0129951
AB4 vs. AB8	Down	REACTOME_PATHWAY	R-GGA-2424491:R-GGA-2424491	DAP12 signaling	15	0.280531	0.0129951
AB4 vs. AB8	Down	REACTOME_PATHWAY	R-GGA-611105:R-GGA-611105	Respiratory electron transport	25	0.467552	0.0140965
AB4 vs. AB8	Down	REACTOME_PATHWAY	R-GGA-3301854:R-GGA-3301854	Nuclear Pore Complex (NPC) Disassembly	16	0.299233	0.0145149
AB4 vs. AB8	Down	REACTOME_PATHWAY	R-GGA-5632684:R-GGA-5632684	Hedgehog 'on' state	30	0.561062	0.0151466
AB4 vs. AB8	Down	REACTOME_PATHWAY	R-GGA-983712:R-GGA-983712	Ion channel transport	12	0.224425	0.0167666
AB4 vs. AB8	Down	REACTOME_PATHWAY	R-GGA-917977:R-GGA-917977	Transferrin endocytosis and recycling	13	0.243127	0.0194935
AB4 vs. AB8	Down	REACTOME_PATHWAY	R-GGA-156590:R-GGA-156590	Glutathione conjugation	9	0.168319	0.0196026
AB4 vs. AB8	Down	REACTOME_PATHWAY	R-GGA-112382:R-GGA-112382	Formation of RNA Pol II elongation complex	14	0.261829	0.0218162
AB4 vs. AB8	Down	REACTOME_PATHWAY	R-GGA-5696400:R-GGA-5696400	Dual Incision in GG-NER	18	0.336637	0.0278144
AB4 vs. AB8	Down	REACTOME_PATHWAY	R-GGA-4615885:R-GGA-4615885	SUMOylation of DNA replication proteins	20	0.374042	0.0293554
AB4 vs. AB8	Down	REACTOME_PATHWAY	R-GGA-1660499:R-GGA-1660499	Synthesis of PIPs at the plasma membrane	20	0.374042	0.0293554
AB4 vs. AB8	Down	REACTOME_PATHWAY	R-GGA-71403:R-GGA-71403	Citric acid cycle (TCA cycle)	11	0.205723	0.0294623
AB4 vs. AB8	Down	REACTOME_PATHWAY	R-GGA-75109:R-GGA-75109	Triglyceride biosynthesis	12	0.224425	0.0330571
AB4 vs. AB8	Down	REACTOME_PATHWAY	R-GGA-2730905:R-GGA-2730905	Role of LAT2/NTAL/LAB on calcium mobilization	8	0.149617	0.0374014
AB4 vs. AB8	Down	REACTOME_PATHWAY	R-GGA-2871796:R-GGA-2871796	FCERI mediated MAPK activation	14	0.261829	0.0381982
AB4 vs. AB8	Down	REACTOME_PATHWAY	R-GGA-109688:R-GGA-109688	Cleavage of Growing Transcript in the Termination Region	23	0.430148	0.0436916
AB4 vs. AB8	Down	REACTOME_PATHWAY	R-GGA-166208:R-GGA-166208	mTORC1-mediated signalling	9	0.168319	0.044991
AB4 vs. AB8	Down	REACTOME_PATHWAY	R-GGA-1445148:R-GGA-1445148	Translocation of GLUT4 to the plasma membrane	9	0.168319	0.044991
AB8 vs. AB16	Not Significant
AB16 vs. AB24	Not Significant
